# Supplementary material for: Physiological tests of small airways function in diagnosing asthma: a systematic review
Source: PubMed Central journal article supplement (PMC7754643; doi:10.1136/bmjresp-2020-000770), 2020-12-21
Supplement: bmjresp-2020-000770supp002.pdf [file bmjresp-2020-000770supp002.pdf]

## PICO Table

### Population

- Adults >18 years old with asthma or clinical suspicion of asthma

### Intervention

- Physiological tests small airways function

### Comparator

- FEV<sub>1</sub>

### Outcome

- Diagnosis of asthma

PICO chart with details of study selection criteria.
