# Supplementary material for: Physiological tests of small airways function in diagnosing asthma: a systematic review
Source: PubMed Central journal article supplement (PMC7754643; doi:10.1136/bmjresp-2020-000770), 2020-12-21
Supplement: bmjresp-2020-000770supp005.pdf [file bmjresp-2020-000770supp005.pdf]

|                     | <u>Risk of Bias</u> |            |                    |                 | <u>Applicability Concerns</u> |            |                    |
|---------------------|---------------------|------------|--------------------|-----------------|-------------------------------|------------|--------------------|
|                     | Patient Selection   | Index Test | Reference Standard | Flow and Timing | Patient Selection             | Index Test | Reference Standard |
| Li et al. 2015      | ?                   | ?          | -                  | +               | -                             | ?          | ?                  |
| Nikkhah et al. 2011 | ?                   | -          | ?                  | +               | +                             | +          | +                  |
| Yartsev 2006        | -                   | -          | +                  | ?               | +                             | ?          | ?                  |

  

|                                                                                               |                                                                                                  |                                                                                              |
|-----------------------------------------------------------------------------------------------|--------------------------------------------------------------------------------------------------|----------------------------------------------------------------------------------------------|
|  <b>High</b> |  <b>Unclear</b> |  <b>Low</b> |
|-----------------------------------------------------------------------------------------------|--------------------------------------------------------------------------------------------------|----------------------------------------------------------------------------------------------|

QUADAS-2 Summary

|                      | Define the source of information | List inclusion and exclusion criteria for exposed and unexposed subjects or refer to previous publications | Indicate time period used for identifying patients | Indicate whether or not subjects were consecutive if not population-based | Indicate if evaluators of subjective components of study were masked to other aspects of the status of the participants | Describe any assessments undertaken for quality assurance purposes | Explain any patient exclusions from analysis | Describe how confounding was assessed and/or controlled | Summarize patient response rates and completeness of data collection | Clarify what follow-up, if any, was expected and the percentage of patients for which incomplete data or follow-up was obtained |
|----------------------|----------------------------------|------------------------------------------------------------------------------------------------------------|----------------------------------------------------|---------------------------------------------------------------------------|-------------------------------------------------------------------------------------------------------------------------|--------------------------------------------------------------------|----------------------------------------------|---------------------------------------------------------|----------------------------------------------------------------------|---------------------------------------------------------------------------------------------------------------------------------|
| Gulden et al. 2011   | +                                | +                                                                                                          | +                                                  | -                                                                         | -                                                                                                                       | -                                                                  | +                                            | +                                                       | +                                                                    | ?                                                                                                                               |
| Koruga et al. 2017   | +                                | +                                                                                                          | -                                                  | -                                                                         | -                                                                                                                       | -                                                                  | -                                            | -                                                       | +                                                                    | -                                                                                                                               |
| Mendonça et al. 2011 | +                                | -                                                                                                          | -                                                  | -                                                                         | ?                                                                                                                       | -                                                                  | +                                            | ?                                                       | +                                                                    | ?                                                                                                                               |
| Mori et al. 2011     | +                                | +                                                                                                          | +                                                  | -                                                                         | -                                                                                                                       | ?                                                                  | +                                            | ?                                                       | +                                                                    | ?                                                                                                                               |
| Mousa & Kamal 2018   | +                                | +                                                                                                          | +                                                  | -                                                                         | -                                                                                                                       | -                                                                  | +                                            | -                                                       | +                                                                    | -                                                                                                                               |
| Nair et al. 2011     | +                                | ?                                                                                                          | +                                                  | -                                                                         | -                                                                                                                       | -                                                                  | +                                            | +                                                       | +                                                                    | ?                                                                                                                               |
| Son et al. 2009      | +                                | +                                                                                                          | +                                                  | -                                                                         | -                                                                                                                       | -                                                                  | +                                            | -                                                       | +                                                                    | -                                                                                                                               |

AHRQ Summary
